# Supplementary material for: Comprehensive Analysis of Metabolome and Transcriptome in Fruits and Roots of Kiwifruit
Source: MDPI journal article supplement (doi:10.3390/ijms24021299), 2023-01-09
Supplement: s1 [file ijms-2111364-supplementary.pdf › ijms-2111364-supplementary.pdf]

Table S1 Primer sequence

| Gene name        | Primer sequence (5' to 3') |
|------------------|----------------------------|
| $\beta$ -ACTIN-F | TGAGAGATTCCGTTGCCCAGAAGT   |
| $\beta$ -ACTIN-R | TTCCTTACTCATGCGGTCTGCGAT   |
| AcC4H-F          | TCGAGTGGGGAATTGCAGAG       |
| AcC4H-R          | AGGTTCATGTGAGGCACGAG       |
| AcCHS-F          | ATCACAGCCGTTACCTTCCG       |
| AcCHS-R          | CTGGAAGGATGGTCTGAGCG       |
| AcRAP2-4-F       | GCGGCTTTGGCTACGATAAG       |
| AcRAP2-4-R       | TCCTCGTATGGCGAACTCTG       |
| AcAP2-4-F        | GGGGTAGGGGCTTGTTTAGG       |
| AcAP2-4-R        | GTTTCGTGGGAGGCGAATCT       |
| AcbHLH62-F       | TGTTTCCATGTCGCGGATCT       |
| AcbHLH62-R       | GCATCACCGTGAAAGTCGTG       |
| AcPAL-F          | TACATCGATGACCCGTGCAG       |
| AcPAL-R          | CCTGTTTCGGAATTCCTCCCC      |
| Ac4CL-F          | ACGATCCAGAGGCCACAAAG       |
| Ac4CL-R          | ACCGATCGACGATGAAGAGC       |
| AcHCR-F          | AACGTCGACCTTGTCATCCC       |
| AcHCR-R          | TTCAAGCGACCAGCCATAGG       |
| AcCHI-F          | CAGTTGGAGACGGAACCCAA       |
| AcCHI-R          | TGAGGAATTCCCATCCGCAC       |
| AcF3H-F          | GTGGCGTACAACGTGTTTCAG      |
| AcF3H-R          | ACACGCCTCCACGATCTTAC       |
| AcFLS-F          | TGTTGAACCTCACACCGACA       |
| AcFLS-R          | TGTGGAGGCACAACAAACAC       |
| AcF3'H-F         | CTCCACGGAAGGTTGACTC        |
| AcF3'H-R         | TGCTATGGCCCACTCAACTG       |
| AcDFR-F          | GGCTATATTGTCCGCGCAAC       |
| AcDFR-R          | CACAGGGTCAGGTTTCGTCTC      |
| AcANS-F          | TCTTCCACCTTGCTTACCCG       |
| AcANS-R          | CTTCGCGTACTCGCTTGTTG       |
| AcANR-F          | GCCTTGTCATGGACGAGAGT       |
| AcANR-R          | GAGCGTGGGAATGACCGTAA       |
| AcCCO-F          | AGGTGTGATCGGCTACGACA       |
| AcCCO-R          | TCCTAGGGTCCACAGCCAAA       |
